# Supplementary material
Source: Atypon-hosted journal article supplement (https://705.library.nashville.org/Record/CARL0000334663/DownloadSupplementalFile?fileId=9)
Supplement: DownloadSupplementalFile [file DownloadSupplementalFile]

**James D. Andrews Papers:**  
**Series II. Frank Maxwell Andrews Series, 1908-c.1950 (bulk 1929-1943)**

**Collection Summary**

**Creator:** James David Andrews, collector

**Title:** Frank Maxwell Andrews Series

**Inclusive Dates:** 1908-c.1950 (bulk 1929-1943)

**Summary/Abstract:** Manuscripts, including some correspondence, periodicals, newspaper clippings, and related materials about the military career of Army Air Corps general and Nashville, Tenn. native, Frank Maxwell Andrews.

**Physical Description/Extent:** .6 cu. ft.

**Series:** Frank Maxwell Andrews Series

**Linking Entry Complexity Note:** Forms part of the James D. Andrews Papers.

**Accession Number:** Acc. RT-100

**Language:** In English.

**Stack Location:** Closed stacks West storage range 1 section 3

**Repository:** Special Collections Division, Nashville Public Library, 615 Church St., Nashville, TN 37219

**Chronology**

|                |                                                                                                 |
|----------------|-------------------------------------------------------------------------------------------------|
| 1884 Feb. 3    | Frank Maxwell Andrews born to James D. and Lula Adaline Maxwell Andrews in Nashville, Tenn.     |
| 1887 Dec.      | Brother James D. Andrews, Jr. born.                                                             |
| 1888 Aug.      | Brother William Valery Andrews born.                                                            |
| 1892 July      | Sister Josephine Andrews born.                                                                  |
| 1901           | Graduates from Montgomery Bell Academy.                                                         |
| 1902           | Enters U.S. Military Academy at West Point, N.Y.                                                |
| 1906 June      | Graduates from U.S. Military Academy with rank of second lieutenant.                            |
| 1906           | Served with 8 <sup>th</sup> Cavalry Regiment in Philippines.                                    |
| 1907 Apr.      | Began service with unidentified cavalry unit at Ft. Yellowstone Wyo.                            |
| 1908 Nov.      | Served at Ft. Huachuca, Ariz.                                                                   |
| 1910 Oct./Nov. | Stationed at Ft. Meyer, Va.                                                                     |
| 1911 Jan.      | Began serving for 3 years as aide to Brig. Gen. Macomb at Schofield Barracks, Honolulu, Hawaii. |
| 1912 Nov. 12   | Promoted to first lieutenant.                                                                   |
| 1913 July      | Returned to mainland U.S. serving with 2 <sup>nd</sup> Cavalry at Ft. Bliss, Tex.               |
| 1913 Dec.      | Stationed at Ft. Ethan Allen, Vt., meets Jeanette Allen, daughter of Gen. Henry T. Allen.       |
| 1914 Mar. 18   | Marries Jeanette Allen.                                                                         |
| 1916 July 15   | Promoted to captain.                                                                            |
| 1917 Apr. 6    | The United States enters World War I.                                                           |
| 1917 Aug. 5    | Transferred to Signal Corps for duty with Aviation Division.                                    |
| 1918 July      | Earned wings as Junior Military Aviator at age 34, considered old.                              |
| 1918 Oct.      | Supervisor of Southeastern Air Service District headquartered in Montgomery, Ala.               |

|                        |                                                                                                                                                                                                                                                                                                                                                                                                                       |
|------------------------|-----------------------------------------------------------------------------------------------------------------------------------------------------------------------------------------------------------------------------------------------------------------------------------------------------------------------------------------------------------------------------------------------------------------------|
| 1918 Nov. 11           | World War I ends.                                                                                                                                                                                                                                                                                                                                                                                                     |
| 1920 Aug. 14           | Sent to Germany as part of Occupation forces                                                                                                                                                                                                                                                                                                                                                                          |
| 1923 June - 1927 Sept. | Stationed at Kelly Field, Tex.                                                                                                                                                                                                                                                                                                                                                                                        |
| 1929 Aug.              | Held rank of major and was executive officer in the office of Chief of Air Service, Washington, DC.                                                                                                                                                                                                                                                                                                                   |
| 1930 Jan. 13           | Promoted to lieutenant colonel.                                                                                                                                                                                                                                                                                                                                                                                       |
| 1931 May               | Held rank of Lt. Col., chief of staff, operations and training divisions, U.S. Army Air Corps, Washington DC.                                                                                                                                                                                                                                                                                                         |
| 1932 Apr.              | Held rank of Col.                                                                                                                                                                                                                                                                                                                                                                                                     |
| 1932 Apr. 19           | Lula Maxwell Andrews dies.                                                                                                                                                                                                                                                                                                                                                                                            |
| 1935 Mar. 1            | Became first Commanding General of GHQ Air Force with temporary rank of Brig. Gen.                                                                                                                                                                                                                                                                                                                                    |
| 1935 Spring            | Andrews makes statement to a 'secret session' of the House of Representatives that U.S. must be prepared, if necessary, to take over bases in other countries if they were in danger of being taken over by forces of enemies of the U.S. His statement is leaked to the press, causing a public outcry and denied as Army policy by Army officials, ultimately resulting in Andrews' censure by President Roosevelt. |
| 1935 Aug. 24           | Sets three world's records in a seaplane for speed without payload, speed with payload of 500 kg, and speed with payload of 1000 kg, breaking all three records previously held by Charles Lindbergh.                                                                                                                                                                                                                 |
| 1935 Dec. 26           | Temporarily promoted to major general.                                                                                                                                                                                                                                                                                                                                                                                |
| 1936 Feb. 22           | Serving as commanding general of General Headquarters Staff, American Air Force, Frank M. Andrews stops at Sky Harbor airport near Murfreesboro, Tenn. in his "office plane" and meets with his father.                                                                                                                                                                                                               |
| 1936 June 14           | Nashville hosts celebration for Frank M. Andrews, including a reception, barbecue, and "sham battle" held on the estate of Col. Henry Dickinson.                                                                                                                                                                                                                                                                      |
| 1936 Nov. 1            | Attends dedication ceremonies for new Nashville Municipal Airport (Berry Field).                                                                                                                                                                                                                                                                                                                                      |
| 1937 Mar. 4            | James D. Andrews dies.                                                                                                                                                                                                                                                                                                                                                                                                |
| 1937-1938              | Participates in "war games" using air power against naval forces.                                                                                                                                                                                                                                                                                                                                                     |
| 1939 Mar.              | Tour of duty as Commanding Gen. of GHQ completed and returned to permanent rank of colonel, sent to Ft. Sam Houston, Tex.                                                                                                                                                                                                                                                                                             |
| 1939 July 1            | Promoted to brigadier general by Gen. George C. Marshall and served on War Dept. General Staff in Washington, under Marshall.                                                                                                                                                                                                                                                                                         |
| 1940 Nov.              | In command of Panama Canal Air Force.                                                                                                                                                                                                                                                                                                                                                                                 |
| 1941 Sept.             | Became first air commander to head a joint forces organization when he became commander of Caribbean Defense Command and Panama Canal Department. The command system he established there was used as a model and advocated by Chief of the Army Air Forces, Gen. H.H. "Hap" Arnold.                                                                                                                                  |
| 1941 Dec. 7            | The United States enters World War II after the Japanese attack Pearl Harbor, Territory of Hawaii.                                                                                                                                                                                                                                                                                                                    |
| 1942 Nov.              | Andrews becomes commander of all U.S. forces in the Middle East.                                                                                                                                                                                                                                                                                                                                                      |
| 1943 (early)           | Andrews becomes commander of U.S. forces in Europe, headquartered in London.                                                                                                                                                                                                                                                                                                                                          |

|              |                                                                                       |
|--------------|---------------------------------------------------------------------------------------|
| 1943 May 3   | Dies in plane crash in Iceland; buried at Arlington National Cemetery, Arlington, Va. |
| 1943 June 14 | Dedication of Andrews Blvd. in Nashville, named in his honor.                         |
| 1944 Feb.    | Dedication of airfield in Dominican Republic, named in his honor.                     |
| 1945         | Camp Springs airbase in Maryland renamed Andrews Field in his honor.                  |
| 1947         | Andrews Field name changed to Andrews Air Force Base.                                 |

### **Biographical/Historical Sketch**

Frank Maxwell Andrews was born on Feb. 3, 1884, the first child of James D. and Lula Maxwell Andrews of Nashville, Tenn. All three of James D. Andrews's sons, Frank (or "Maxwell" as he was called in the family), James D. Andrews, Jr. (probably known as "David") and William Valery Andrews would go on to have military careers. He had one sister, Josephine, who later married Nashvillian Gillespie Sykes. Frank Maxwell Andrews attended public schools until the age of 13, when he entered Montgomery Bell Academy in Nashville, graduating in 1901. The following year, he entered the United States Military Academy at West Point, N.Y., where he graduated in 1906 with the rank of second lieutenant. He was sent to serve with the 8<sup>th</sup> Cavalry Regiment in the Philippines. He returned to the United States about a year later, serving briefly in Wyoming, Arizona, and Virginia. In 1911, he became an aide to Brigadier General Macomb at Schofield Barracks in Hawaii, and returned to the United States mainland in the summer of 1913. He married Jeanette Allen on Mar. 18, 1914. Both Frank and Jeanette, who went by the nickname, "Johnnie," were avid polo players. She was the daughter of General Henry T. Allen. Allen, sensing Andrews's growing interest in aviation, declared no aviator would ever marry his daughter. Andrews remained in the cavalry for a time, but after several years of married life, in 1917, he joined the Signal Corps serving in the Aviation Division.

Although considered old for an aviator, he nevertheless rapidly advanced in rank and responsibility. In 1918, he became supervisor of the Southeastern Air Service District. After World War I, he served in Germany as part of the Occupation, and commanded air forces under his father-in-law, Maj. Gen. Henry T. Allen. He returned to the United States sometime in the early 1920s, and he continued to advance in his career. On Mar. 1, 1935, he became the first Commanding General of GHQ Air Force, with the temporary rank of Brigadier General. His work in this capacity established the modern Air Force. Key innovations were the consolidation of all Army Air Forces under one overall command, the development of regional air commands, and improved training and strategic planning, especially in the strategic and tactical uses of bombers. In 1935, he set three new world records for speed in a seaplane, breaking the records held by Charles Lindbergh. Also in 1935, he caused an uproar when he stated before a House of Representatives secret session that it might be necessary for American forces to seize airbases of other countries if they were in danger of becoming a threat to the United States. The statement was leaked to the press, the Army denied such a policy, and President Roosevelt censured him. This difficulty did not, however, ultimately affect his career. He returned to Nashville numerous times, and was honored in June 1936 by Col. Henry Dickinson, who hosted a large community barbeque for him. He also spoke as a visiting dignitary at the dedication of the new Nashville Municipal Airport in 1936. In March 1939, his duties at GHQ ceased and he was returned to the rank of colonel, though four months later he was given the permanent rank of brigadier general.

by Gen. George C. Marshall, serving on the War Department General Staff in Washington, DC. In 1940, he was given command of the Panama Canal Air Force, and in 1941 became the first air commander to head a joint forces operation. As World War II got underway, Andrews was promoted to even higher positions of authority. In November of 1942, he became commander of all U.S. forces in the Middle East; and in early 1943, he was sent to Europe with similar authority. On May 3, 1943, he died in a plane crash in Iceland, along with Methodist Bishop Adna W. Leonard, Brig. Gen. Charles Barth, Col. Morrow Krum, and others; only one man survived. Andrews received many posthumous honors, including the addition of an oak leaf cluster to his Distinguished Service Medal; the renaming of an airfield in Maryland in his honor (which was subsequently renamed Andrews Air Force Base in 1947); the naming of an airfield in the Dominican Republic in 1944; and the dedication of a street in his hometown of Nashville, Tenn. He was survived by his wife, Jeanette, and three children: Allen, Josephine (Mrs. Hiette S. Williams Jr.); and Jean, who was unmarried at the time of his death, but later married Martin F. Peterson. He is buried at Arlington National Cemetery in Virginia.

### **Scope and Contents of the Collection**

Manuscripts, including some correspondence, periodicals, newspaper clippings, and related materials about the military career of Army Air Corps general and Nashville, Tenn. native, Frank Maxwell Andrews, most dating from 1929-1943, although some items are as early as 1908 or as late as circa 1950.

The manuscripts subseries primarily consists of periodicals featuring articles about Andrews and his military career. A few other items, such as tickets and invitations are also included in this subseries. There is a small amount of correspondence, although most items of this nature have been pasted-over with newspaper clippings. Nevertheless, some of the original letters can still be read, at least in part.

Clippings document Andrews's career in great detail, provide numerous anecdotes, and include information about his wife, Jeannette, and her father, Gen. Henry T. Allen. Information on other Andrews family members, such as Frank Maxwell Andrews's parents, James D. and Lula Andrews, and his siblings, James D. Andrews, Jr., William Valery Andrews, and Josephine Sykes, is also included. Clippings are especially strong about Andrews's actions and influence during his assignments in the Panama Canal Zone and Caribbean, with GHQ Air Force, and the uproar caused by his statements before a House Committee in which he recommended taking over airbases in French and British possessions if America was threatened by enemy troops holding those bases. There are also numerous accounts about his death in a plane crash in Iceland in 1943, along with Methodist Bishop Adna W. Leonard, Brig. Gen. Charles Barth, and Col. Morrow Krum who also died. A few clippings provide information about Andrews's involvement, with his father, in the push to get a new airport for Nashville, Tenn.; a visit to Sky Harbor airport near Murfreesboro, Tenn. in 1936; and a grand celebration in his honor hosted by Col. Henry Dickinson of Nashville in 1936, where he was awarded a trophy. Some clippings also discuss Army Air Corps training, war games, planes, strategy, and reorganization, as they relate to Andrews's career and influence.

Researchers are advised to consult Series I: James D. Andrews Series of this collection, which documents in more detail Frank Maxwell Andrews's efforts on behalf of his father's actions to obtain a new airport for Nashville. The younger Andrews often provided advice, specifications, and opinions about sites under consideration for a new airfield. He also assisted by providing information about the affect of airplanes on patients in insane asylums, an issue which threatened to stall or kill plans to develop the Harris farm site, near the Central State Hospital in Nashville. Series I also contains some personal correspondence between father and son, in which Frank Maxwell Andrews occasionally discusses places where he is stationed, his family, or other subjects. Researchers should check the finding aid to Series I for more details.

One newspaper article from Series III: Miscellaneous Nashville Subjects, is included in this finding aid, since it concerns Frank Maxwell Andrews.

In addition to the biographical information on Frank Maxwell Andrews, there are a number of articles or anecdotes which relate to his two brothers, James D. Andrews Jr. who served in the engineers, and William Valery Andrews, who was also in Army aviation. Especially noteworthy is a clipping from Nov. 1941 (Folder 79) in which William Valery Andrews states that the Japanese population of Hawaii would be loyal to the United States in the event of war between the U.S. and Japan.

### **Organization/Arrangement of Materials**

The collection is organized into the following series:

- I. James D. Andrews Series
- II. Frank Maxwell Andrews Series
- III. Miscellaneous Nashville subjects

This finding aid concerns only Series II. Additional finding aids are available for other series.

Series II is divided further into the following subseries by format:

- A. Manuscripts, 1921-c.1950 (no arrangement scheme)
- B. News clippings, 1908-1946 (bulk 1930-1943) (no arrangement scheme)

### **Restrictions**

**Restrictions on Access:** In library use only. Available by appointment.

**Restrictions on Use and Reproduction:** Some items are very fragile, and must be handled with care.

### **Index Terms**

#### **Personal Names:**

Allen, Henry T. (Henry Tureman), 1859-1930  
Andrews, Frank Maxwell, 1884-1943  
Andrews, James David, 1857-1937

Andrews, James David, b. 1887  
Andrews, Jeanette (Jeanette Allen)  
Andrews, Lula Maxwell, 1859-1932  
Andrews, William Valery, b.1888  
Barth, Charles Henry, d. 1943  
Dickinson, Henry, Colonel  
Krum, Morrow, d. 1943  
Leonard, Adna W., d. 1943  
Sykes, Josephine (Josephine Andrews), b. 1892

**Corporate Names/Organizations:**

General Andrews Airport (Santo Domingo, Dominican Republic)  
Montgomery Bell Academy (Nashville, Tenn.) -- Alumni and alumnae -- Biography  
Sky Harbor (Airport : Murfreesboro, Tenn.)  
United States. Army. Air Corps. -- History -- 20<sup>th</sup> century  
United States. Army. Air Corps. -- Headquarters  
United States. Army. Air Service  
United States. Army Air Forces  
United States. Army. Caribbean Defense Command  
United States. Army. Cavalry  
United States. Army. European Theater of Operations  
United States Military Academy -- Alumni and alumnae -- Biography

**Subjects:**

Aeronautics, Military -- United States  
Aeronautics -- Records  
Air pilots -- United States -- Biography  
Air power -- United States -- Political aspects  
Air power -- United States -- Public opinion  
Air warfare -- United States -- Planning  
Aircraft accidents -- Iceland  
Airplanes -- Speed records  
Airplanes, Military -- United States  
Armed Forces -- Officers -- Biography  
Bombers -- United States  
Courtship -- Anecdotes  
Generals -- United States -- Biography  
Horsemen and horsewomen -- United States -- Anecdotes  
Japanese Americans -- Hawaii -- Attitudes  
Military planning -- United States -- Public opinion  
Polo players -- United States  
War games -- United States  
Women in horse sports -- United States  
World records

World War, 1939-1945 -- Aerial operations, American

**Places:**

Caribbean Area -- Military relations -- United States  
Central America -- Military relations -- United States  
Langley Field (Va.)  
Nashville (Tenn.) -- Biography  
Panama -- Military relations -- United States  
Panama Canal (Panama) -- Strategic aspects  
United States -- History -- 20<sup>th</sup> century

**Genre/Document Types:**

Clippings (information artifacts)  
Correspondence  
Manuscripts (document genre)  
Periodicals

**Occupations:**

Air pilots  
Generals

**Associated and Related Material**

The Tennessee State Library and Archives, Nashville, Tenn. holds the Frank Maxwell Andrews Papers.

**Separated Material**

A number of photographs appear to have been separated from this series of the collection prior to reprocessing in 2009. The photographs are incorporated into the Nashville Room Historic Photographs Collection. Photographs known to be associated with the Andrews Papers and separated from them are identified as follows:

- P-1810 Pontoon military airplane in flight - photo credit, Langley Field, Va.
- P-1811 Military biplanes in formation in flight – photo credit, Crissy Field, Presidio, San Francisco, Calif.
- P-1812 Four snapshots of military biplanes in formation flying low over airfield, under command of Lt. Col. F.M. Andrews, California, April 1930
- P-1813 Military biplanes in flight over mountainous terrain - photo credit, Crissy Field, Presidio, San Francisco, Calif.
- P-1814 Military biplanes in flight over mountainous terrain, closer than in P-1813 and taken from above - photo credit, Crissy Field, Presidio, San Francisco, Calif.
- P-1815 Military biplanes in flight, taken from side- photo credit, Crissy Field, Presidio, San Francisco, Calif.
- P-1816 Pontoon military airplane in flight, taken from side

Two additional photographs concern Frank Maxwell Andrews, but their provenance is unknown. They may or may not have originally been a part of the original Andrews Papers. They are part of the Nashville Room Historic Photographs Collection and are identified as follows:

- P-95 Lt. Gen. Frank M. Andrews, in uniform, outdoors at unidentified location, car and building behind him.
- P-1961 Trophy cup presented to Frank M. Andrews.

### **Administrative Information**

**Copyright:** Nashville Public Library does not have intellectual property rights to these materials. This material may be protected by copyright law (Title 17 U.S. Code)

**Preferred Citation:** [description of item], [folder number], Frank Maxwell Andrews Series, James D. Andrews Papers, Special Collections Division, Nashville Public Library

**Immediate Source of Acquisition:** Source of acquisition unknown, but donated probably before 1980.

**Ownership and Custodial History:** Unknown provenance. Many materials probably collected by James D. Andrews, although a number of items are dated after his death. Some materials may have been collected by the sister of Frank Maxwell Andrews, Josephine Sykes.

**Processing Information:** Collection was originally physically housed in the library in three different areas: Persons Ephemera Subject Files; closed stacks shelf; oversize drawer. No original order was discernable within the materials. Materials were consolidated into one collection and artificially organized into three series by Library staff, and rehoused in appropriate storage containers.

**Accruals:** No further accruals are expected.

### **Other Finding Aids**

See additional finding aid for Series I – James D. Andrews and Series III – Miscellaneous Nashville subjects

### **References to Works by or about Collection Creator/Topic**

The Tennessee State Library and Archives holdings include the William Valery Andrews Papers. William was Frank Maxwell Andrews's brother.

A biography by DeWitt S. Copp entitled *Frank M. Andrews: Marshall's Airman* (Washington, D.C.: Air Force History and Museums Program, 2003) is available online (as of Apr. 2009) at:

<http://www.airforcehistory.hq.af.mil/Publications/fulltext/FrankMAAndrews.pdf>

### **Detailed Description of the Collection**

**Series II. Frank Maxwell Andrews Series, 1908-c. 1950, .6 cu. ft.**



**Sub-series A. Frank Maxwell Andrews Manuscripts, 1921-c. 1950, .2 cu. ft.**

**Series Abstract/Description:** Manuscripts, including some correspondence and numerous periodicals containing articles about Frank M. Andrews and his military career.

**Arrangement:** No arrangement scheme

**Container List:** Folders 60-71, 77-78

**Sub-series B. Frank Maxwell Andrews Clippings, 1908-1946 (bulk 1930-1943), .4 cu. ft.**

**Series Abstract/Description:** Newspaper clippings, many from the *Nashville Banner*, and *Tennessean*, but including a number of other newspapers from other cities, concerning the military career of Frank M. Andrews. His promotions and numerous special assignments are well-documented, and a significant portion of the clippings are about his death and posthumous honors.

**Arrangement:** No arrangement scheme

**Container List:** Folders 71-74, 79, 82-84

1 item in Folder 85, part of Series III and concerning Frank M. Andrews, is described below.

**Container List**

Abbreviations:

FMA = Frank Maxwell Andrews

JDA = James D. Andrews

**Subseries A – Manuscripts**

Folder                      Summary of contents

- |    |                                                                                                                                                                                                                                                                                                                                                                                         |
|----|-----------------------------------------------------------------------------------------------------------------------------------------------------------------------------------------------------------------------------------------------------------------------------------------------------------------------------------------------------------------------------------------|
| 60 | Admission ticket to General Andrews Day at Col. Dickinson's farm, June 14, 1936; menu & program from Mid-South Section of American Society of Civil Engineers meeting Oct. 25, 1940; paper from dedication of Andrews Blvd. June 13, 1943; V-mail from Joe Thompson Jr. to "Cousin Josephine" Sykes, May 9, 1943, telling of his meeting w/Gen. Andrews and reaction to Andrews' death. |
| 61 | <i>The Ground Ace</i> , Apr. 1, 1921, vol. 1 no. 1, published in Weissenthurm, Germany. Cover photo of Maj. Frank M. Andrews "Our Chief."                                                                                                                                                                                                                                               |
| 62 | "Notice to Aviators," May 1, 1921, No. 5, U.S. Navy Dept. Information about various landing fields in the United States, markings, use of radio & pigeons.                                                                                                                                                                                                                              |
| 63 | <i>The Reserve Officer</i> , Jan. 1935, vol. 12, no. 1, U.S. Army. Article: "Air Force Commander Plans Maneuvers."                                                                                                                                                                                                                                                                      |

- 64 *The National Aeronautic Magazine*, Feb.-Mar. 1935, vol. 13, no.2 & 3, National Aeronautic Association. Article: "Our New GHQ Air Force."
- 65 *U.S. Air Services: Feature Aeronautical Magazine, Commercial and Military*, May 1935, vol. 20, no. 5, Air Service Publishing, Inc. Cover photo of Brig. Gen. Frank M. Andrews, Commander of GHQ Air Force, and article, "Significance of the General Headquarters Air Force" by Lt. Col. John D. Reardan.
- 66 *The Bee-Hive*, Oct. 1935, vol. 9 no. 10, United Aircraft Corporation. Article: "General Andrews Sets World's Records with Hornet-powered Martin Bomber."
- 67 *Time* magazine, July 29, 1940, vol. 36, no. 5. Article: "National Defense," includes profile of Brig. Gen. Frank M. Andrews.
- 68 *The American Legion Magazine*, March 1942, vol. 32, no. 3. Article: "Leading the Army Team," includes profile of Lt. Gen. Frank M. Andrews.
- 69 *Air Force: The Official Journal of the Air Force Association*, Sept. 1947, vol. 30, no. 9.
- 70 Unidentified notes or essay about the worldwide political consequences of World War II, c. 1950
- 71 This folder, although part of the clippings subseries, contains some manuscripts. Clippings have been pasted on to manuscript letters, presumably written by FMA. Portions of the letters are legible, but much is obscured by clippings. Letters date from 1930-1932.  
from Washington, DC Dec. 9, 1930, FMA to mother: Reference to David (perhaps James D. Andrews Jr.) stationed in Panama, having sinus difficulties, may return to States; F---? Field, possibly located in Central or South America, near Panama, or in Washington DC;  
Apr. 3, 1932, FMA to JDA: tells of flying over jungle so thick that the ground could not be seen, mentions Guatemala; unidentified fragment of letter, possibly continuation of previous: Costa Rica, Panama, will start for New York Apr. 16 [1932?] in the Republic [airplane?];  
from Washington DC July 14, 1931, FMA to JDA: "Judith, David and the children" were at "our bachelor house" for dinner, played bridge, David looks well but still complains of ailments but expects to get out of hospital soon, Nelson has recovered from his operation;  
from Mather Field, Sacramento, Calif. Apr. 6, 1930, FMA to JDA: "I am glad to know that the board of experts recommended the Harris farm. You may get a big sale out of it." put on a show in San [Francisco? Fernando?]

- 77        *The War Cry* Feb. 1932, includes photograph of FMA and father JDA at Sky Harbor, Tenn.
- 78        *London Calling*, June 6-12, 1943, article, "HQ ETOUSA," notice of FMA's death as going to print

## **Subseries B - Clippings**

- 71        Dates: 1908-09, 1917-18, 1921, 1923-24, 1928-29, 1930-33, 1935-37, 1946

Newspapers: *Tennessean*, *Nashville American*, *Nashville Banner*, *Washington Post*, *Dayton Journal*, *Chicago Daily Tribune*, (unidentified) Shreveport, Louisiana

Subjects: FMA promotion from Maj. to Lt. Col. and from Col. to Maj. Gen.; FMA flights in U.S. and Europe, incl. Coblenz, Germany to London, England; seaplane record attempt by FMA; visits by FMA to parents in Nashville; FMA's opinions on Nashville airport; FMA's family incl. wife and son; FMA visits Cuba; airplanes flown by FMA; Lt. J.D. Andrews Jr. sent to Europe as engineer in rebuilding efforts; FMA directs war games and maneuvers at Dayton, OH and Chicago, IL; Johnnie Andrews & women's polo; FMA meets with Ray Murphy of American Legion; FMA promoted to Maj. and transfers from cavalry to aviation; FMA service with 8th Cavalry; various promotions of FMA; death, funeral, obituary of Charles Sykes, Gillespie Sykes, and Lula Andrews.

Persons & Businesses: FMA; JDA; JDA Jr.; Johnnie Andrews (FMA's wife); Ray Murphy, National Commander American Legion; Gillespie Sykes; Charles Sykes; Lula Andrews.

Locations: Cuba; San Antonio, TX; Dayton, OH; Coblenz, Germany; London, England; McConnell Field, Nashville, TN; Sky Harbor, Murfreesboro, TN; Washington, DC; Chapman Field, Miami, FL; Barksdale Field; Fort Ethan Allen, VT; Yellowstone National Park; Fort Yellowstone; Panama; Central America; South America; Mather Field, Sacramento, CA; Guatemala; Costa Rica; San Francisco or San Fernando, CA; Harris farm site, Nashville, TN;

Maps, Photos, Illustrations (in newspapers): Photos of Johnnie (Mrs. Frank M.) Andrews; Col. FMA and airplanes on maneuvers; Gillespie Sykes; Charles S. Sykes.

Notes: Many clippings have been pasted on to manuscript letters, presumably written by FMA. Portions of the letters are legible, but much is obscured by clippings. For details, see entry for this folder in Manuscripts Subseries.

72      Dates: 1930, 1934-37

Newspapers: *Nashville Banner*, *Tennessean*, *Washington Herald*, *Presbyterian Tribune*

Subjects: 27th Pursuit Squadron of First Pursuit Group stops at Sky Harbor under command of FMA; FMA's "air office" plane; FMA as head of GHQ Air Force; Andrews family history provided and controversy and defense of FMA's statements concerning war appears in *Presbyterian Tribune* article; Baker Board (results in formation of GHQ); R.O.T.C. in Nashville high schools; Barbeque hosted at Col. Henry Dickinson's farm in honor of FMA

Persons/Businesses: FMA, JDA

Locations: Sky Harbor; Nashville high schools

Maps, Photos, Illustrations (in newspapers): FMA, JDA, Mrs. JDA, FMA's sister Mrs. Gillespie Sykes; airplanes in formation, photo of trophy presented to FMA by Nashville citizens

73      Dates: 1921, 1930-32, 1934-36, 1939, 1942

Newspapers: *Tennessean*, *Nashville Banner*, *San Francisco Examiner*, *Miami Herald*, *Washington Post*, *Pathfinder*, *New York Times Magazine*, *San Diego Union*, *Miami Daily News*

Subjects: FMA's testimony before House committee that US may need to seize British and French possession in time of war & breach of secrecy by Rep. John Jackson McSwain, related uproar; Capt. William V. Andrews with British Squadron leader Carnegie at Bolling Field; tribute to FMA (after his death); FMA promoted to Maj. Gen.; breaking of 3 world records by FMA; war games and maneuvers in California and Miami; description of flight from Coblenz, Germany to London, England; biographical sketches of JDA and his three military sons; establishment of GHQ Air Force; statements by FMA on various subjects incl. readiness, strategy, defense; address to National Aeronautic Association about U.S. mainland defense and state of the Air Force; inspection of Panama Canal Zone defenses by Sec. of Navy.

Persons/Businesses: FMA, JDA, William V. Andrews; JDA Jr.; Sec. Navy Frank Knox; Rear Adm. Clifford Evans Van Hook; Rep. John Jackson McSwain of SC.

Locations: Caribbean; Bolling Field; Panama Canal Zone; Coblenz, Germany; London; Miami, Florida; California.

Maps, Photos, Illustrations (in newspapers): FMA, JDA, JDA Jr., William V. Andrews, air dignitaries and officers, Sec. Navy Frank Knox, Rear Adm. Clifford Evans Van Hook

74      Dates: 1925, 1937, 1943

Newspapers: *Memphis Press Scimitar*; *Cincinnati Times-Star*; *Nashville Banner*; *Memphis Commercial Appeal*; *New York Herald Tribune*; unidentified San Diego newspaper; *New York Times*; unidentified St. Louis newspaper;

Subjects: Death of JDA; death of Lula Andrews; deaths of FMA, Methodist Bishop Adna W. Leonard, Brig. Gen. Charles Barth, Col. Morrow Krum and others in crash in Iceland; dedication of airfield in Dominican Republic in FMA's name; posthumous award of Oak Leaf Clusters and Distinguished Service Medal to FMA; FMA's burial in Arlington National Cemetery

Persons/Businesses: JDA; Lula Andrews; FMA; Bishop Adna W. Leonard; Brig. Gen. Charles Barth; Col. Murrow Krum

Locations: Iceland; Arlington National Cemetery; Dominican Republic

Maps, Photos, Illustrations (in newspapers):  
FMA; Bishop Leonard

79      Dates: c. 1929, 1935-36, 1940-42

Newspapers: *Spartanburg (SC) Herald, Banner, Tennessean, Denver Post, Collier's, New York Times, Memphis Commercial Appeal, Baltimore Sun*

Subjects: FMA's courtship, marriage, and honeymoon "on horseback" father-in-law objected to aviator so he went to cavalry; Gen. Hq. Air Force to be established at Langley Field, FMA to command; FMA assumes command of GHQ AF (1000 planes unified from throughout country); FMA visits Lowry Field, Denver; Col. William V. Andrews says Japanese in Hawaii would be loyal if war comes between U.S. & Japan, Nov. 1941;

Lt. Gen. FMA commander in Canal Zone; Flying Fortresses and training and organization under FMA; Brig. Gen. FMA, Lt. Col. JDA Jr., Lt. Col. William Valery Andrews to speak at American Society of Civil Engineers Mid-South Section in Memphis (Oct. 25, 1940); sham battle hosted at estate of Col. Henry Dickinson in FMA's honor; report of Lt. Gen. FMA on anti-submarine measures taken in Caribbean, incl. photojournalist's eyewitness account of attack by sub near Aruba

Persons/Businesses: FMA; Jeanette Allen (wife); Maj. Henry T. Allen (father-in-law); Col. William V. Andrews; Lt. Col. James D. Andrews Jr.

Locations: Langley Field, VA; Lowry Field, Denver, CO; Hawaii; Panama Canal Zone; Memphis; Sky Harbor, Murfreesboro, TN; Nashville Municipal Airport; Caribbean; Aruba

Maps, Photos, Illustrations (in newspapers): FMA as cadet at West Point and with father, JDA; numerous military photos of FMA; photo of airplanes in formation over Capitol at Washington DC; all 3 Andrews brothers together in Memphis; sham battle at Col. Dickinson's estate in Nashville.

- 82      1930, Apr. 27, *Tennessean* – Lt. Col. FMA in command of forces in air war games training exercise in California, photographs of FMA and airplanes in maneuvers, incl. smokescreen over Capitol bldg. in Sacramento
- 1933, Oct. 23, *Detroit Sunday Times* – Col. FMA commander at Selfridge Field; flying hazards and risks; photographs of pilots and FMA
- 1935, Dec. 8, *Miami Herald* – Brig. Gen. FMA headquarters at Chapman Field, Miami. Photographs of FMA, airplanes and activities at field, in preparation of 8th Annual Miami All-American Air Maneuvers air show, Brig. H.H. “Hap” Arnold
- 1935, Apr. 21, *Denver Post* – Air Attack is form of Air Defense; photographs of Maj.Gen. Douglas MacArthur; Lt. Col. FMA; how to defend against and avert an invasion or attack against continental U.S.; need to increase air force and add bombers; increased funding needed; Maj. Gen. J.E. Fechet
- 1935, undated, *Philadelphia Inquirer Magazine* Section – “Caught in the 200-Mile-an-Hour ‘Breath of Death’” – describes narrow escape of Chief Test Engineer from being sucked into a wind tunnel – presumably this must be Col. FMA, since his pictures are featured with the article

83      1936, Feb. 23, *Banner* – “Father Greets Son in Office Plane” – photograph of James D. Andrews and Maj. Gen. Frank Andrews inside of the general’s plane which serves as an office. “Gen. Andrews’ Office Plane Makes Stop at Sky Harbor,” news article, discusses details of plane, required use of parachutes, military flying, crew.

1936, June 15, *Banner* – “Nashville Aviation Leaders Welcome General Andrews,” photograph of several men including General Andrews, Will T. Cheek, Col. Henry Dickinson, Col. Herbert Fox in car at Sky Harbor.

undated, *Tennessean* – “‘Red’ Army Planes Bomb and Gas Sixth Corps Encampment,” article about war games in Michigan and mock attack by Red aerial forces against Blue encampment. General Andrews ordered aviation attack.

1936, June 14, *Banner Magazine* – “Nashville Honors its distinguished Soldier-Flier, Citizens Will Present Trophy to Maj.-Gen. Frank M. Andrews, Head of the General Headquarters Army Air Force, at Reception and Barbecue Today” – full page spread including numerous photographs, includes biographical information, and info about GHQ Air Force.

1942, Mar. 22, *Tennessean* – “Guardian of the Canal, Risking His Neck Normal for General Andrews” – summary of Andrews’ service until this time, and description of his duties as head of Caribbean Command, which guards the Panama Canal Zone

1940, Dec. 1, *Commercial Appeal* (Memphis) – “They’re In His Army Now” – Training operations at Ft. Knox, including tank corps; Andrews’s role in organizing the Army and training influx of new draftees, including organizing tank corps and use of parachute troops; Andrews has reputation for being able to fly in difficult weather conditions; follows a hypothetical infantry soldier “Bill Jones” through his training program.

84      Articles concerning death of Gen. Andrews, and dedication of airfield in Dominican Republic in his honor

Feb. 22, 1944 - *La Nacion* (Ciudad Trujillo, Dominican Republic)

May 5, 1943 – unidentified paper

May 5, 1943 – *Tennessean*

### **Series III. Miscellaneous Nashville Subjects**

(Referred to here because a portion of their contents concern Frank Maxwell Andrews. Only descriptions relating to Series II subjects have been excerpted for this finding aid. Additional material within the listed folders, as well as entire folders which do not

contain materials related to Series II are omitted from this list. Refer to finding aid for Series III for details not appearing here.)

- 85      1921, July 24, *Banner*, “Weekly Gravure Pictorial” – “Some of Uncle Sam’s Nashville Army Officers,” including: Capt. B.J. Shoemaker, Maj. Frank Maxwell Andrews, chief of American air service in Germany, stationed at Coblenz, Germany, Maj. John Milum, Lt. S.G. Hughes, Capt. James D. Andrews, Jr., First Engineers, Camp Dix, NJ, Capt. Ben Allen Mason, Col. Lytle Brown? (illegible), Capt. Robert Rush Hawes, Jr., 1st Lt. Wm. Valery Andrews, Air Service, Washington DC, Gen. William R. Smith
